# Supplementary material for: Zymomonas mobilis ZM4 Utilizes an NADP+-Dependent Acetaldehyde Dehydrogenase To Produce Acetate
Source: PubMed Central journal article supplement (PMC9017298; doi:10.1128/jb.00563-21), 2022-03-08
Supplement: jb.00563-21-s0001.pdf [file jb.00563-21-s0001.pdf]

Supplementary Figures

Created with SnapGene®

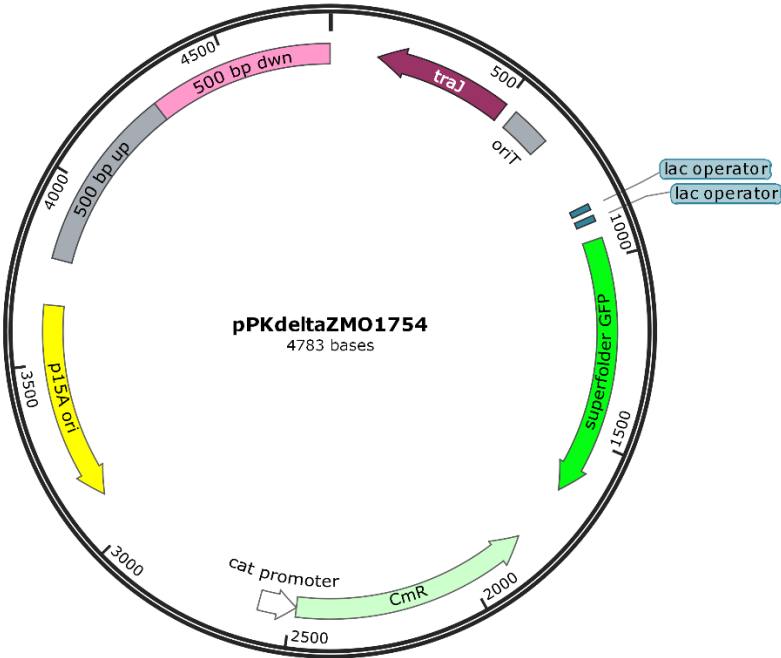

Figure S1. pPKΔZMO1754 map. 500 bp fragments directly upstream and downstream of ZMO1754 were amplified from ZM4 chromosome and Gibson assembly into pPK15534 digested with *SpeI* as described in Materials and Methods.

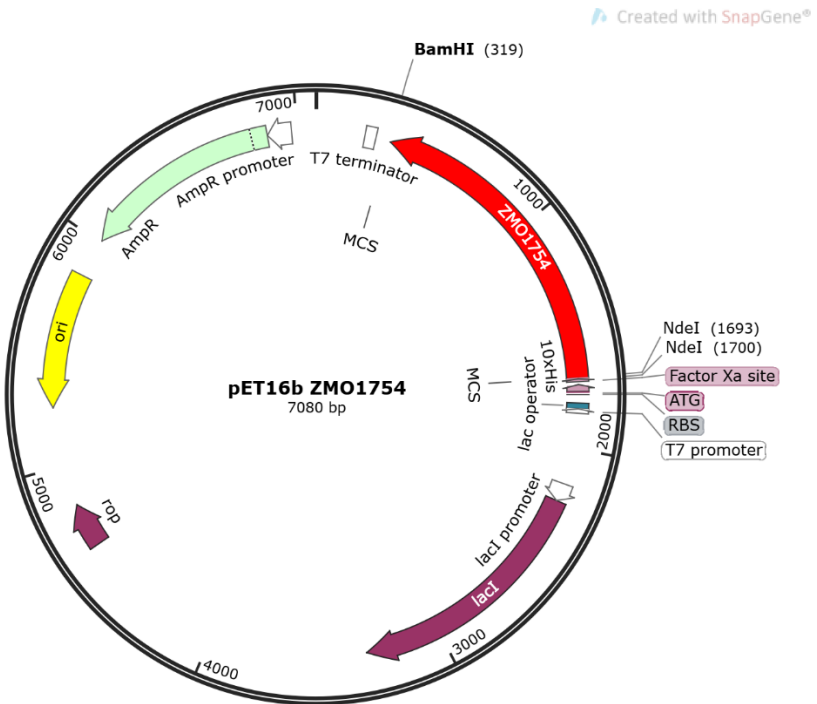

Figure S2. pET16baldB map. The *aldB* (ZMO1754) gene was amplified from ZM4 and cloned to pET16b between NdeI and BamHI sites using Gibson Assembly as described in Materials and Methods. AldB protein was fused with 10 histidine residues at N-terminus and placed under T7 promoter of pET16b. Primers are listed in Table 2.

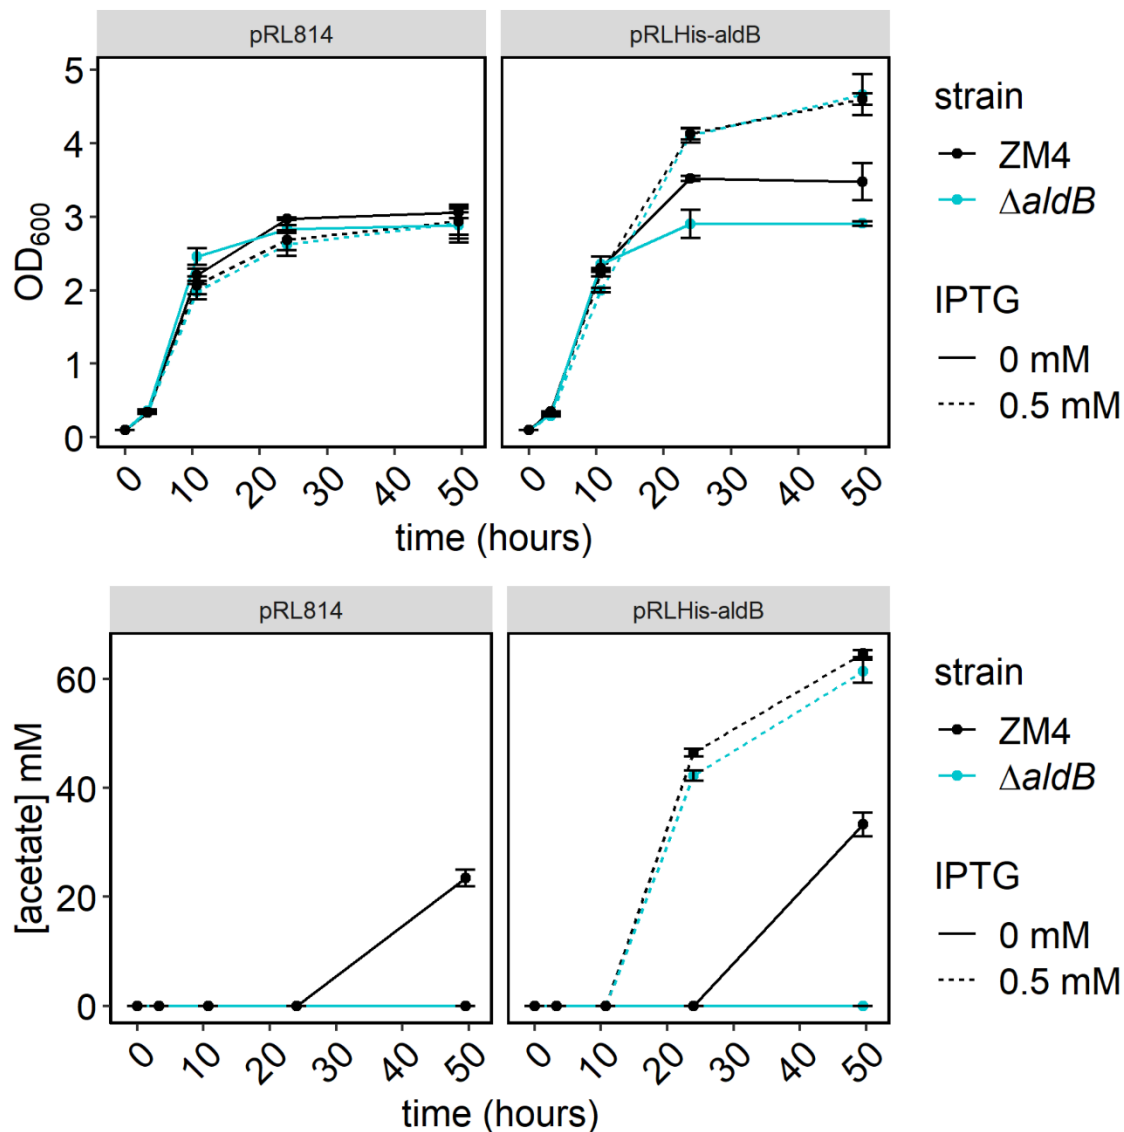

Figure S3. Growth and acetate production by *Z. mobilis* ZM4 WT (black) and  $\Delta aldB$  (blue) bearing plasmid pRLHis-aldB with (dashed) and without (solid) IPTG induction. Strains bearing pRLHis-aldB or pRL814, were grown as in Figure 2 but media were supplemented with 100  $\mu$ g/ml of spectinomycin and IPTG was added to 0.5 mM, at time of dilution, when indicated. HPLC analysis was performed as in Figure 3 Points represent the average of three biological replicates and error bars represent standard error.

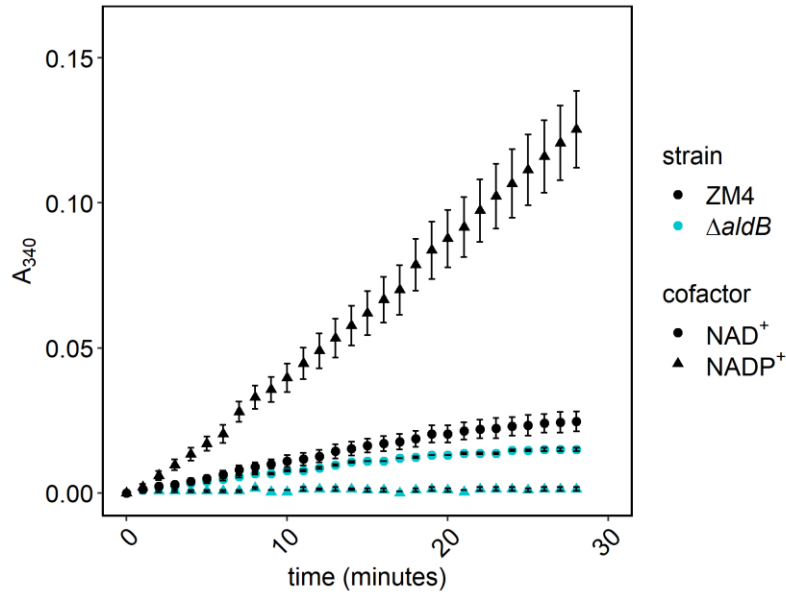

Figure S4. Acetaldehyde dehydrogenase activity in soluble protein fractions from ZM4 WT and  $\Delta aldB$ . Soluble protein fraction (FI) was obtained as described in “Materials and Methods”. Average, total protein concentration in FI was 5.7 +/- 0.5 mg/ml and 5.2 +/- 0.7 mg/ml for ZM4 and  $\Delta aldB$ , respectively. Each enzymatic reaction contained: 0.1 M Tris HCl pH 8.0, 0.1 M KCl, 10 mM  $\beta$ -mercaptoethanol, 2 mM acetaldehyde and 0.67 mM NAD<sup>+</sup> or NADP<sup>+</sup> (protocol for yeast acetaldehyde dehydrogenase from Sigma-Aldrich). Reaction was started by adding 33  $\mu$ l of FI and measured for 30 minutes at 25°C in 24-well microtiter plate. Absorbance at 340 nm in control without FI was subtracted from the reactions. Points represent the average of three independent experiments with three technical repeats and error bars represent standard error.

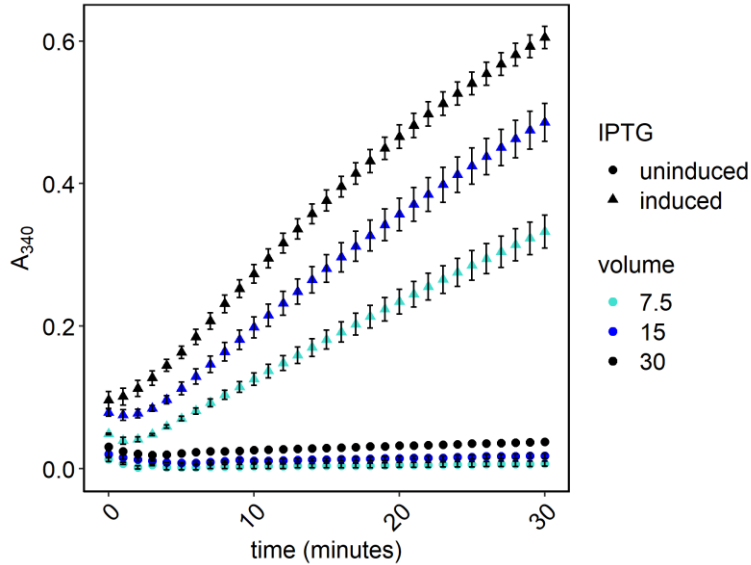

Figure S5. Acetaldehyde dehydrogenase activity in soluble protein fraction from *E. coli* BL21 carrying a plasmid expressing *aldB*. 50-mL cultures were grown in LB supplemented with ampicillin at 30°C to OD<sub>600</sub> 0.4. At this point, IPTG was added to a final concentration of 0.1 mM, where indicated, and growth continued for 1.5 hours. FI was obtained as described in “Materials and Methods” for *Z. mobilis*. Average total protein concentration in three independent FI was 11±1.2 mg/ml and 8.4±1.1 mg/ml for uninduced and induced cultures, respectively. An enzymatic assay was performed as described in Figure S4, with NADP as a cofactor. The reaction was started by adding variable volumes of FI as indicated. Points represent the average of three independent FI and error bars represent standard error.

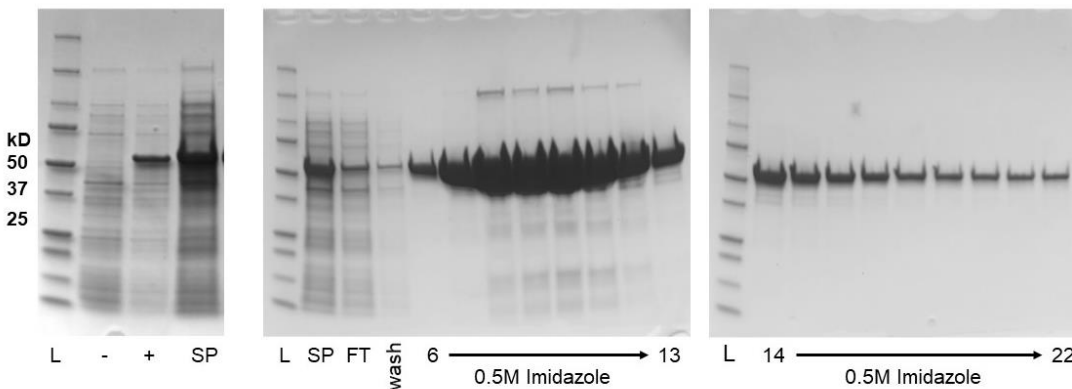

Figure S6. Ni-affinity purification of His-AldB. Protein was overexpressed in *E. coli* BL21(DE3) from pET16*aldB* induced with IPTG as described in Materials and Methods. Soluble protein fraction was loaded on Ni-affinity column and the protein was eluted with IMAC C buffer containing 0.5 M imidazole. Protein on different stages of purification is visualized on Coomassie stained SDS-PAGE as described in Materials and Methods. L, All Blue Protein Ladder; -/+ indicates induction with IPTG; SP, soluble protein fraction; FT, flow through; wash, IMAC B (20 mM imidazole buffer); 6-22, IMAC C fractions.

CLUSTAL multiple sequence alignment by MUSCLE (3.8)

pomaceae MAYESVNPATGETVKKYPDLSDAQVKEAIDRTFDVVFQKDWGKRSIEDRSKILHKAAEIFR  
francensis MAYESVNPATGETVKKYPSFSDAQVKEAVDRAATVFKNDWSQRTIAERSKVLHKAADIFR  
Z6 MAYESVNPATGEIVKKYPDFSDKQVKESVDRAATVFKNDWSQRTIAERSKVLHKAADIFR  
B23394 MAYESVNPATGEIVKKYPDFSDKQVKESVDRAATVFKNDWSQRTIAERSKVLHKAADIFR  
B4492 MAYESVNPATGEIVKKYPDFSDKQVKESVDRAATVFKNDWSQRTIAERSKVLHKAADIFR  
ZM4 MAYESVNPATGETVKKYPDFSDKQVKDSVDRAATVFKNDWSQRTIAERSKVLHKAADIFR  
CP1 MAYESVNPATGETVKKYPDFSDKQVKDSVDRAATVFKNDWSQRTIAERSKVLHKAADIFR  
B1960 MAYESVNPATGETVKKYPDFSDKQVKDSVDRAATVFKNDWSQRTIAERSKVLHKAADIFR  
CP3 MAYESVNPATGETVKKYPDFSDKQVKDSVDRAATVFKNDWSQRTIAERSKVLHKAADIFR  
CP4 MAYESVNPATGETVKKYPDFSDKQVKDSVDRAATVFKNDWSQRTIAERSKVLHKAADIFR  
B12526 MAYESVNPATGETVKKYPDFSDKQVKDSVDRAATVFKNDWSQRTIAERSKVLHKAADIFR  
B10988 MAYESVNPATGETVKKYPDFSDKQVKDSVDRAATVFKNDWSQRTIAERSKVLHKAADIFR  
CU1 MAYESVNPATGETVKKYPDFSDKQVKDSVDRAATVFKNDWSQRTIAERSKVLHKAADIFR  
CU1rif2 MAYESVNPATGETVKKYPDFSDKQVKDSVDRAATVFKNDWSQRTIAERSKVLHKAADIFR  
uvs51 MAYESVNPATGETVKKYPDFSDKQVKDSVDRAATVFKNDWSQRTIAERSKVLHKAADIFR  
PROIMI MAYESVNPATGETVKKYPDFSDKQVKDSVDRAATVFKNDWSQRTIAERSKVLHKAADIFR  
NCIMB11163 MAYESVNPATGETVKKYPDFSDKQVKDSVDRAATVFKNDWSQRTIAERSKVLHKAADIFR  
\*\*\*\*\*:\*\*\*\*:\*\*\*\*:\*\*\*\*:\*\*\*\*:\*\*\*\*:\*\*\*\*:\*\*\*\*:\*\*\*\*:\*\*\*\*:\*\*\*\*:\*\*\*\*

pomaceae SDIDKYARLMTLEMGRIEEEARGEVKLSADILDYAKNGSTFLAPQKVEEKPGAVVKAFP  
francensis SDIDKYAKLMTIEMGRLEEARGEVKLSADILDYAKNGAAFLAPQKVEEKPGAVIKAFP  
Z6 SDVDKYAKLLTIDMGKKIAEARGEVKLSADILDYAKNGEKFLAPQKVEEKPGAVVKAFP  
B23394 SDVDKYAKLLTIDMGKKIAEARGEVKLSADILDYAKNGEKFLAPQKVEEKPGAVVKAFP  
B4492 SDVDKYAKLLTIDMGKKIAEARGEVKLSADILDYAKNGEKFLAPQKVEEKPGAVVKAFP  
ZM4 SDVDKYAKLLTIDMGKKIAEARGEVNLSDADILDYAKNGEKFLAPQKVEEKPGAVVKAFP  
CP1 SDVDKYAKLLTIDMGKKIAEARGEVKLSADILDYAKNGEKFLAPQKVEEKPGAVVKAFP  
B1960 SDVDKYAKLLTIDMGKKIAEARGEVKLSADILDYAKNGEKFLAPQKVEEKPGAVVKAFP  
CP3 SDVDKYAKLLTIDMGKKIAEARGEVKLSADILDYAKNGEKFLAPQKVEEKPGAVVKAFP  
CP4 SDVDKYAKLLTIDMGKKIAEARGEVKLSADILDYAKNGEKFLAPQKVEEKPGAVVKAFP  
B12526 SDVDKYAKLLTIDMGKKIAEARGEVKLSADILDYAKNGEKFLAPQKVEEKPGAVVKAFP  
B10988 SDVDKYAKLLTIDMGKKIAEARGEVKLSADILDYAKNGEKFLAPQKVEEKPGAVVKAFP  
CU1 SDVDKYAKLLTIDMGKKIAEARGEVKLSADILDYAKNGEKFLAPQKVEEKPGAVVKAFP  
CU1rif2 SDVDKYAKLLTIDMGKKIAEARGEVKLSADILDYAKNGEKFLAPQKVEEKPGAVVKAFP  
uvs51 SDVDKYAKLLTIDMGKKIAEARGEVKLSADILDYAKNGEKFLAPQKVEEKPGAVVKAFP  
PROIMI SDVDKYAKLLTIDMGKKIAEARGEVKLSADILDYAKNGEKFLAPQKVEEKPGAVVKAFP  
NCIMB11163 SDVDKYAKLLTIDMGKKIAEARGEVKLSADILDYAKNGEKFLAPQKVEEKPGAVVKAFP  
\*\*:\*:\*:\*:\*:\*:\*:\*:\*:\*:\*:\*:\*:\*:\*:\*:\*:\*:\*:\*:\*:\*:\*:\*:\*:\*:\*:\*:\*:\*:\*:\*:\*

pomaceae LGLLLAIEPWNFPYYQLARIAGPYLVAGNALLVKHSSSVPQSAHAFAEAVLEEAGAPKGIY  
francensis LGLLLAIEPWNFPYYQLARIAGPYLVAGNALLVKHSSSVPQSAHAFAEAVLEEAGAPKGIY  
Z6 LGLLLAIEPWNFPYYQLARIAGPYLIAGNALLVKHSSSVPQSAHAFAEAVLEEAGAPKGIY  
B23394 LGLLLAIEPWNFPYYQLARIAGPYLIAGNALLVKHSSSVPQSAHAFAEAVLEEAGAPKGIY  
B4492 LGLLLAIEPWNFPYYQLARIAGPYLIAGNALLVKHSSSVPQSAHAFAEAVLEEAGAPKGIY  
ZM4 LGLLLAIEPWNFPYYQLARIAGPYLIAGNALLVKHSSSVPQSAHAFAEAVLEEAGAPKGIY  
CP1 LGLLLAIEPWNFPYYQLARIAGPYLIAGNALLVKHSSSVPQSAHAFAEAVLEEAGAPKGIY  
B1960 LGLLLAIEPWNFPYYQLARIAGPYLIAGNALLVKHSSSVPQSAHAFAEAVLEEAGAPKGIY  
CP3 LGLLLAIEPWNFPYYQLARIAGPYLIAGNALLVKHSSSVPQSAHAFAEAVLEEAGAPKGIY  
CP4 LGLLLAIEPWNFPYYQLARIAGPYLIAGNALLVKHSSSVPQSAHAFAEAVLEEAGAPKGIY  
B12526 LGLLLAIEPWNFPYYQLARIAGPYLIAGNALLVKHSSSVPQSAHAFAEAVLEEAGAPKGIY  
B10988 LGLLLAIEPWNFPYYQLARIAGPYLIAGNALLVKHSSSVPQSAHAFAEAVLEEAGAPKGIY  
CU1 LGLLLAIEPWNFPYYQLARIAGPYLIAGNALLVKHSSSVPQSAHAFAEAVLEEAGAPKGIY  
CU1rif2 LGLLLAIEPWNFPYYQLARIAGPYLIAGNALLVKHSSSVPQSAHAFAEAVLEEAGAPKGIY  
uvs51 LGLLLAIEPWNFPYYQLARIAGPYLIAGNALLVKHSSSVPQSAHAFAEAVLEEAGAPKGIY  
PROIMI LGLLLAIEPWNFPYYQLARIAGPYLIAGNALLVKHSSSVPQSAHAFAEAVLEEAGAPKGIY  
NCIMB11163 LGLLLAIEPWNFPYYQLARIAGPYLIAGNALLVKHSSSVPQSAHAFAEAVLEEAGAPKGIY  
\*\*\*:\*\*\*\*\*:\*\*\*\*\*:\*\*\*\*\*:\*\*\*\*\*:\*\*\*\*\*:\*\*\*\*\*:\*\*\*\*\*:\*\*\*\*\*:\*\*\*\*\*



pomaceae                   EFFGPIAQIYSVESEAKAIELANDSPYGLGGAVFAKDIEHGCKVAEQIETGMVSVNKPLW  
francensis               EFFGPVAHVYAVKDEAAAIELANDSPYGLGGAVFAPDLDKGREVAEQIETGMVAINKPLW  
Z6                         EFFGPIAQIYAVKDEAEAIELANDSPYGLGGAVFAPDVEQGRKVAEQIETGMVAINKPLW  
B23394                   EFFGPIAQIYAVKDEAEAIELANDSPYGLGGAVFAPDVEQGRKVAEQIETGMVAINKPLW  
B4492                   EFFGPIAQIYAVKDEAEAIELANDSPYGLGGAVFAPDVEQGRKVAEQIETGMVAINKPLW  
ZM4                       EFFGPIAQIYAVKDEAEAIELANDSPYGLGGAVFAPDVEQGRKVAEQIETGMVAINKPLW  
CP1                       EFFGPIAQIYAVKDEAEAIELANDSPYGLGGAVFAPDVEQGRKVAEQIETGMVAINKPLW  
B1960                   EFFGPIAQIYAVKDEAEAIELANDSPYGLGGAVFAPDVEQGRKVAEQIETGMVAINKPLW  
CP3                       EFFGPIAQIYAVKDEAEAIELANDSPYGLGGAVFAPDVEQGRKVAEQIETGMVAINKPLW  
CP4                       EFFGPIAQIYAVKDEAEAIELANDSPYGLGGAVFAPDVEQGRKVAEQIETGMVAINKPLW  
B12526                  EFFGPIAQIYAVKDEAEAIELANDSPYGLGGAVFAPDVEQGRKVAEQIETGMVAINKPLW  
B10988                  EFFGPIAQIYAVKDEAEAIELANDSPYGLGGAVFAPDVEQGRKVAEQIETGMVAINKPLW  
CU1                       EFFGPIAQIYAVKDEAEAIELANDSPYGLGGAVFAPDVEQGRKVAEQIETGMVAINKPLW  
CU1rif2                 EFFGPIAQIYAVKDEAEAIELANDSPYGLGGAVFAPDVEQGRKVAEQIETGMVAINKPLW  
uvs51                   EFFGPIAQIYAVKDEAEAIELANDSPYGLGGAVFAPDVEQGRKVAEQIETGMVAINKPLW  
PROIMI                  EFFGPIAQIYAVKDEAEAIELANDSPYGLGGAVFAPDVEQGRKVAEQIETGMVAINKPLW  
NCIMB11163             EFFGPIAQIYAVKDEAEAIELANDSPYGLGGAVFAPDVEQGRKVAEQIETGMVAINKPLW  
\*\*\*\*\*:\*:\*:\*:\*:\*:\*.\* \*  \*\*\*\*\* \* :\*:\*:\* :\*\*\*\*\*:\*:\*\*\*\*\*\*

pomaceae                   TAPELPFGGVKHSYGRGRELSHFGIQEFINWKLIDASAAE  
francensis               TAPELPFGGVKHSYGRGRELSHFGIQEFINWKLIDGSAA-  
Z6                         TAPELPFGGVKHSYGRGRELSHFGIQEFINWKLIDASAA-  
B23394                   TAPELPFGGVKHSYGRGRELSHFGIQEFINWKLIDASAA-  
B4492                   TAPELPFGGVKHSYGRGRELSHFGIQEFINWKLIDASAA-  
ZM4                       TAPELPFGGVKHSYGRGRELSHFGIQEFINWKLIDASAA-  
CP1                       TAPELPFGGVKHSYGRGRELSHFGIQEFINWKLIDASAA-  
B1960                   TAPELPFGGVKHSYGRGRELSHFGIQEFINWKLIDASAA-  
CP3                       TAPELPFGGVKHSYGRGRELSHFGIQEFINWKLIDASAA-  
CP4                       TAPELPFGGVKHSYGRGRELSHFGIQEFINWKLIDASAA-  
B12526                  TAPELPFGGVKHSYGRGRELSHFGIQEFINWKLIDASAA-  
B10988                  TAPELPFGGVKHSYGRGRELSHFGIQEFINWKLIDASAA-  
CU1                       TAPELPFGGVKHSYGRGRELSHFGIQEFINWKLIDASAA-  
CU1rif2                 TAPELPFGGVKHSYGRGRELSHFGIQEFINWKLIDASAA-  
uvs51                   TAPELPFGGVKHSYGRGRELSHFGIQEFINWKLIDASAA-  
PROIMI                  TAPELPFGGVKHSYGRGRELSHFGIQEFINWKLIDASAA-  
NCIMB11163             TAPELPFGGVKHSYGRGRELSHFGIQEFINWKLIDASAA-  
\*\*\*\*\*.\*:\*:\*:\*:\*:\*.\* \*

Figure S7. *Z. mobilis* AldB (ZMO1754) multiple sequence alignment. Alignment of AldB from different laboratory strains of *Zymomonas mobilis* was performed by MUSCLE. Origin and characteristics of different laboratory strains of *Z. mobilis* are described in (7).
